# Supplementary material for: Cooxidant-free TEMPO-mediated oxidation of highly crystalline nanocellulose in water
Source: Royal Society of Chemistry journal article supplement (doi:10.1039/c4ra11182f), 2014-10-13
Supplement: c4ra11182f1.pdf [file c4ra11182f1.pdf]

Electronic Supplementary Information

for

Cooxidant-free TEMPO-mediated Oxidation of Highly Crystalline  
Nanocellulose in Water

*Daniel O. Carlsson, Jonas Lindh, Leif Nyholm, Maria Strømme and Albert Mihranyan*

*FTIR*

FTIR spectra were collected as described in the main article and are shown in Fig. S1.

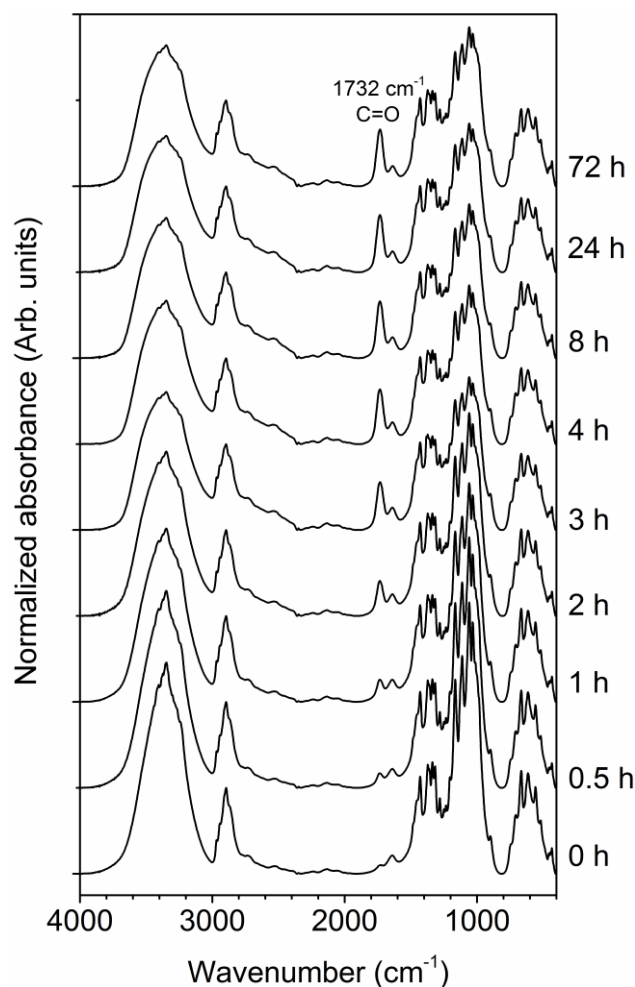

**Fig. S1.** FTIR spectra of the investigated samples, the number of hours on the right-hand side denote oxidation duration.

*N<sub>2</sub> sorption isotherms*

The BET specific surface areas as well as BJH total pore volumes and pore size distributions were derived from the isotherms shown in Fig. S2. All isotherms display a small hysteresis, indicating that the samples have pores up to ~100 nm in diameter, but no limiting adsorption at high relative pressures, indicating that larger pores may be present as well.<sup>1</sup>

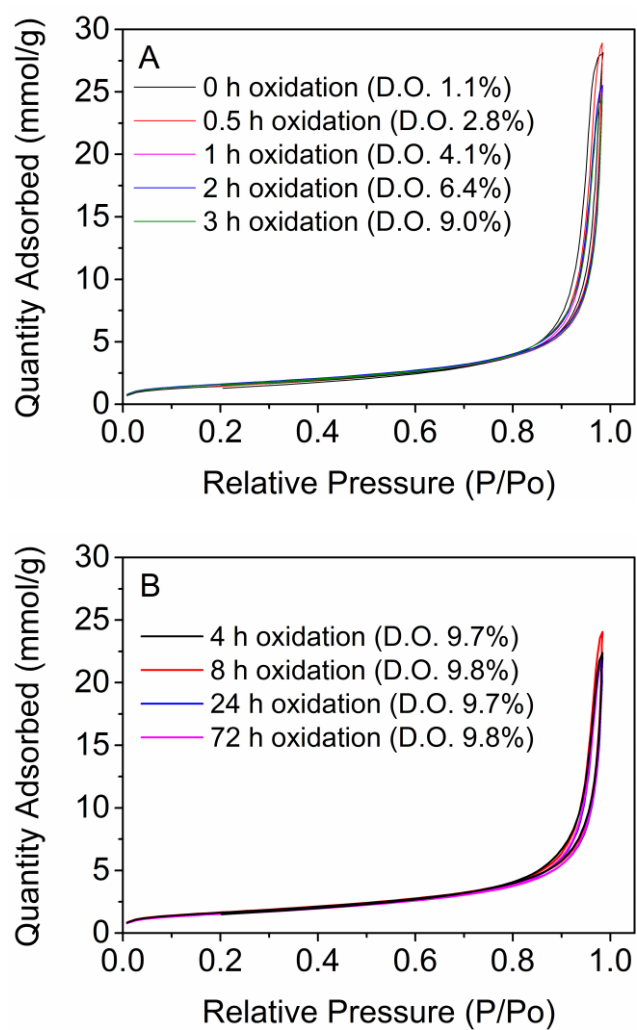

**Fig. S2.** N<sub>2</sub> sorption isotherms.

## Reference

1. R. Pierotti and J. Rouquerol, *Pure Appl. Chem.*, 1985, **57**, 603-619.
